# Supplementary material
Source: publisher figshare collection journal article supplement (https://frontiersin.figshare.com/ndownloader/files/35023948)
Supplement: Supplementary file 1 [file 35023948]

A1

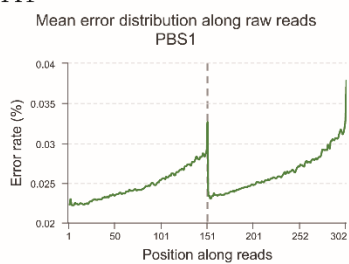

A2

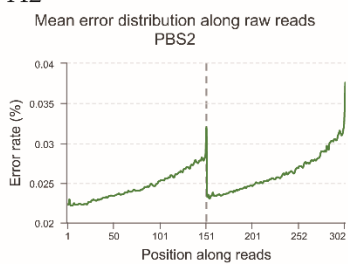

A3

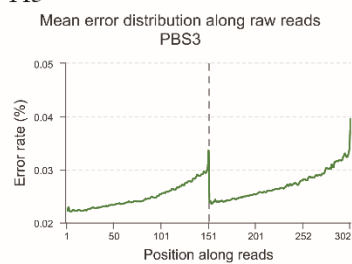

B1

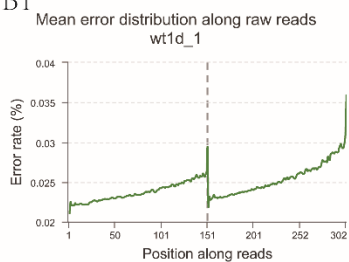

B2

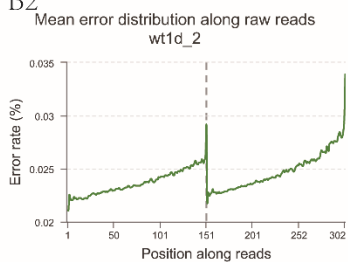

B3

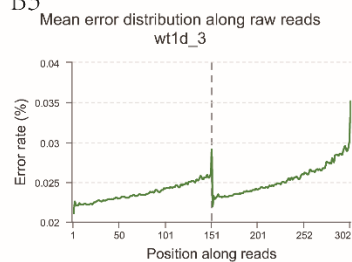

C1

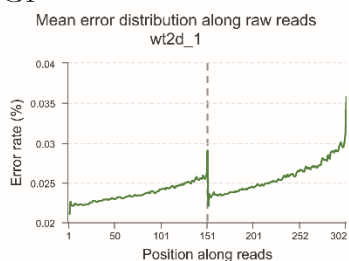

C2

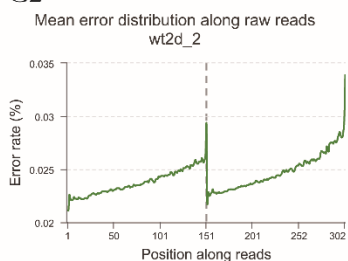

C3

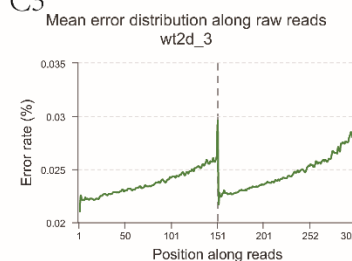

D1

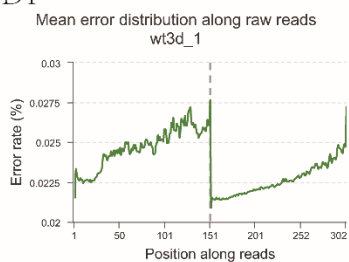

D2

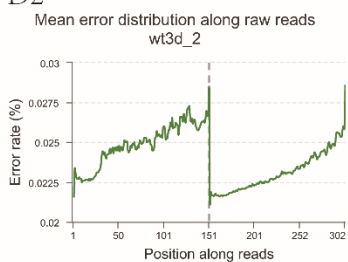

D3

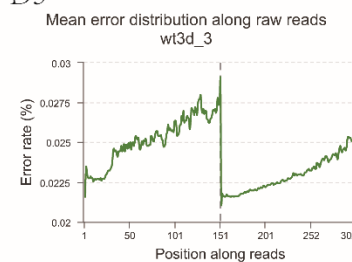

E1

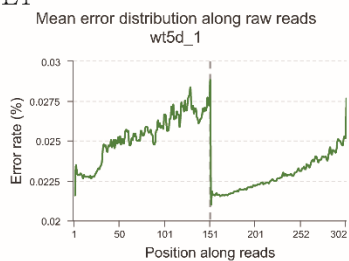

E2

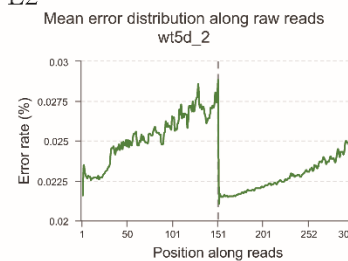

E3

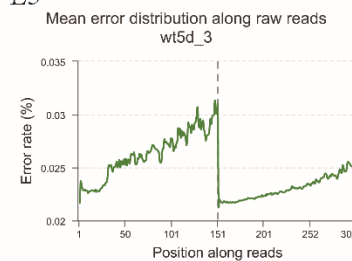

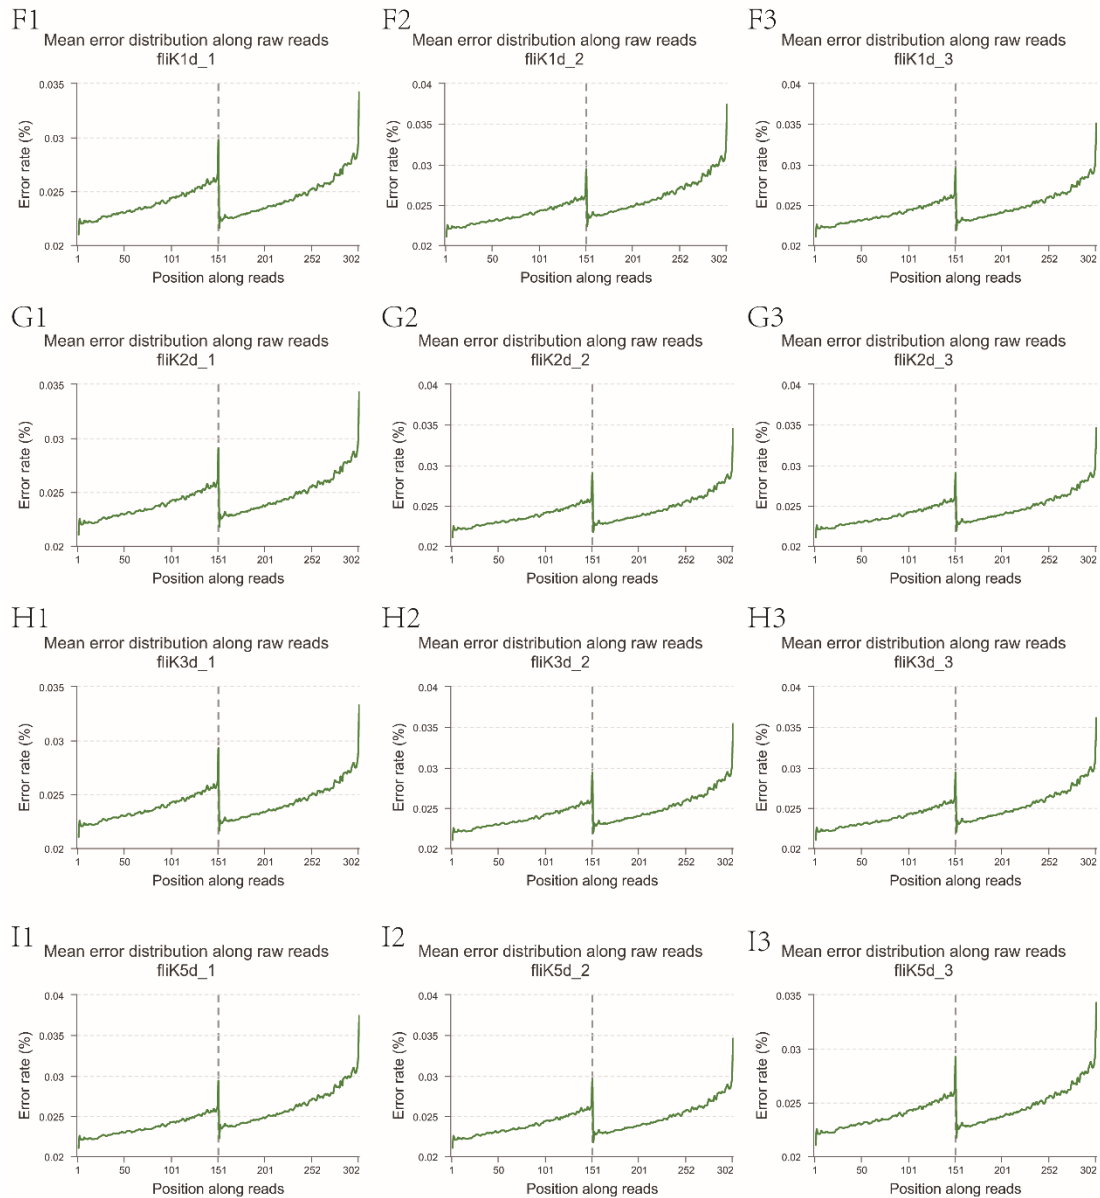

**Supplementary Figure 3. Mean error distribution along raw reads.** The abscissa is the sequence of bases from 5' to 3' in reads and the ordinate is the average error rate (%) of all reads at this site. The green line in the graph corresponds to the average value of the base error rate, which reflects the distribution of base error rate in the sequencing reads. (A1) - (A3) are PBS injected group; (B1) - (E3) are wild type strain infected group; (F1) - (I3) are *fliK*-RNAi strain infected group.
